# Supplementary material for: Designer labels for plant metabolism: statistical design of isotope labeling experiments for improved quantification of flux in complex plant metabolic networks
Source: Royal Society of Chemistry journal article supplement (doi:10.1039/c2mb25253h), 2012-10-09
Supplement: c2mb25253h.pdf [file c2mb25253h.pdf]

## SUPPLEMENTARY MATERIAL I

### Finding free fluxes in the metabolic networks

Metabolic networks were mathematically modeled by steady state flux balance equations around metabolites. Reversible fluxes were modeled by two different fluxes – a forward flux and a backward flux. The reversibility ‘ $r$ ’ of a reaction is defined as

$$r = \frac{v_f}{v_b},$$

where  $v_f$  is the forward flux and  $v_b$  the backward flux.

The number of free fluxes  $f$  in a metabolic network with  $m$  metabolites and  $n$  net fluxes of which  $p$  are measured is given by  $f = n - m - p$ . The free fluxes in a metabolic network were chosen such that the matrix  $S_c$  was invertible

$$S_c \cdot v_c + S_m \cdot v_m = \mathbf{0}$$

$$v_c = (S_c^{-1}) \cdot S_m \cdot v_m,$$

here  $v_m$  and  $v_c$  are the measured and estimated fluxes respectively.

Several sets of free fluxes exist and they can be transformed into each other. Free fluxes and reversibilities are the parameters of the mathematical model that have to be estimated by fitting experimental measurements to the model.
